# Supplementary material for: Subarachnoid Hemorrhage “Fast Track”: A Health Economics and Health Care Redesign Approach for Early Selected Hospital Discharge
Source: PubMed Central journal article supplement — Mayo Clin Proc Innov Qual Outcomes. 2020 Jun 5;4(3):238–48. doi: 10.1016/j.mayocpiqo.2020.04.001 (PMC7283927; doi:10.1016/j.mayocpiqo.2020.04.001), 2020-06-05
Supplement: mmc1.pdf [file mmc1.pdf]

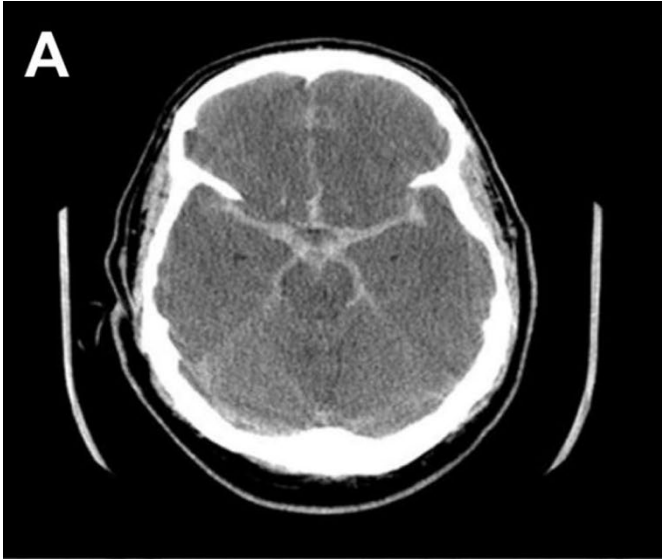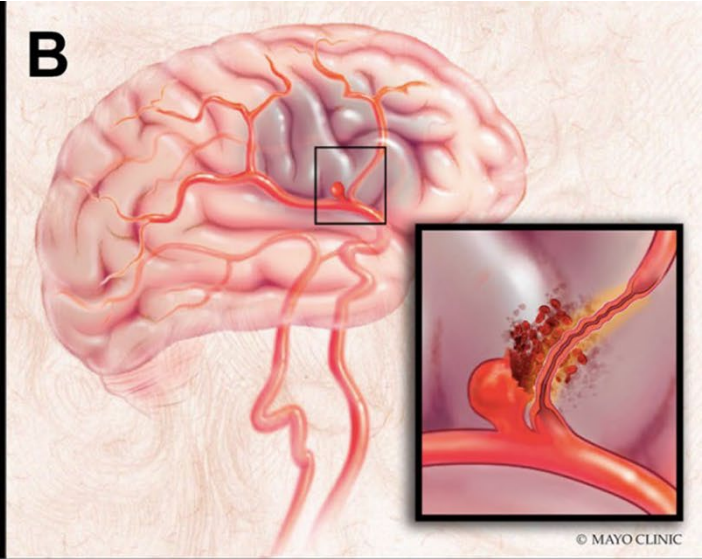

© MAYO CLINIC

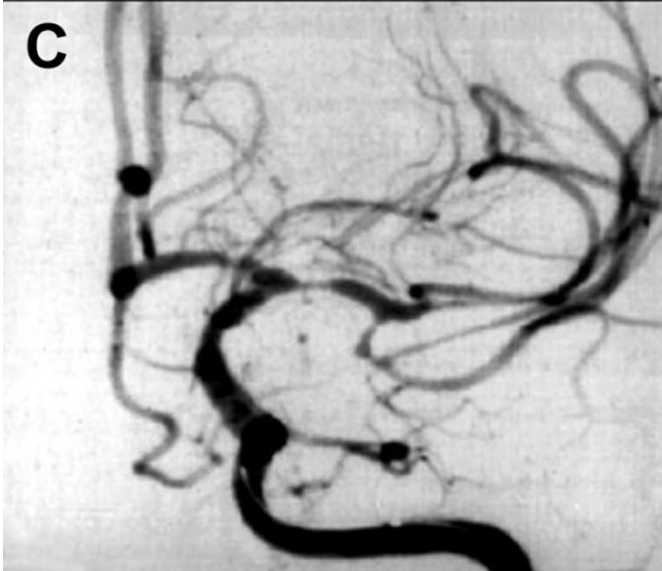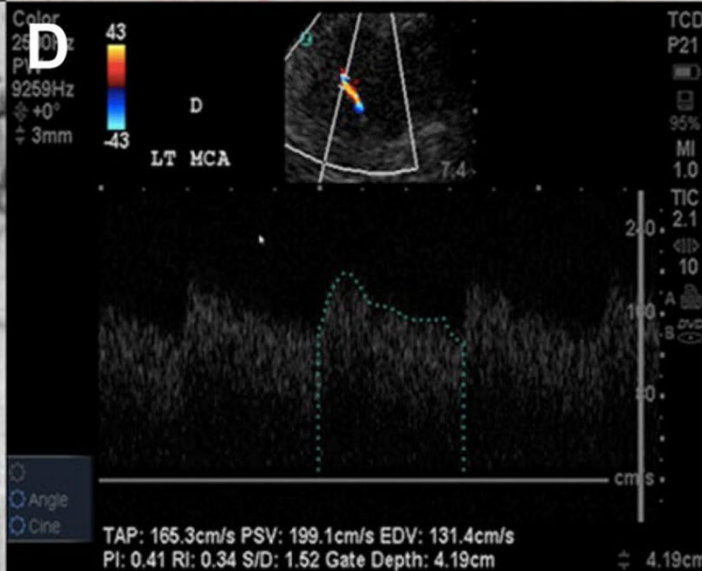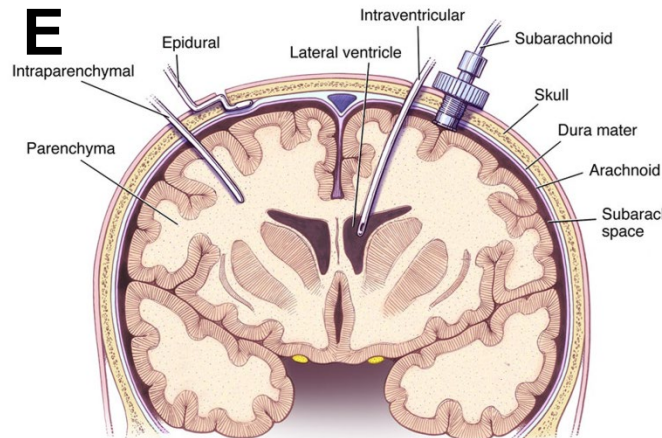

© MAYO CLINIC

**Intracranial Pressure Monitoring Sites**

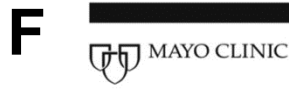

**Stroke:  
Every Minute Matters**

If you have a stroke, early treatment can help reduce damage to your brain and loss of physical and mental function.

- Stroke warning signs**
- Sudden numbness, weakness or paralysis of the face, arm or leg, usually on one side of the body
  - Sudden difficulty speaking or trouble understanding others
  - Sudden blurred or decreased vision, or sudden double vision
  - Sudden loss of balance or coordination
  - Sudden severe headache with no apparent cause
  - Sudden difficulty swallowing

- If you have any of these stroke warning signs:**
- Do not delay.
  - Call 911 or your designated emergency number right away.
  - Do not drive yourself to the emergency room.

**Medical information**

My medications: \_\_\_\_\_

\_\_\_\_\_

\_\_\_\_\_

\_\_\_\_\_

\_\_\_\_\_

My allergies: \_\_\_\_\_

\_\_\_\_\_

\_\_\_\_\_

My health care provider's telephone number: \_\_\_\_\_
